# Supplementary material
Source: publisher figshare collection journal article supplement (https://acs.figshare.com/ndownloader/files/5740362)
Supplement: Supplementary file 1 [file 5740362]

  
data_ejc39t 
  
_audit_creation_method            SHELXL-97 
_chemical_name_systematic 
; 
 ? 
; 
_chemical_name_common             ? 
_chemical_melting_point           ? 
_chemical_formula_moiety          ? 
_chemical_formula_sum 
 'C12 H13 I O3' 
_chemical_formula_weight          332.12 
  
loop_ 
 _atom_type_symbol 
 _atom_type_description 
 _atom_type_scat_dispersion_real 
 _atom_type_scat_dispersion_imag 
 _atom_type_scat_source 
 'C'  'C'   0.0033   0.0016 
 'International Tables Vol C Tables 4.2.6.8 and 6.1.1.4' 
 'H'  'H'   0.0000   0.0000 
 'International Tables Vol C Tables 4.2.6.8 and 6.1.1.4' 
 'O'  'O'   0.0106   0.0060 
 'International Tables Vol C Tables 4.2.6.8 and 6.1.1.4' 
 'I'  'I'  -0.4742   1.8119 
 'International Tables Vol C Tables 4.2.6.8 and 6.1.1.4' 
  
_symmetry_cell_setting            Monoclinic 
_symmetry_space_group_name_H-M    P2(1) 
  
loop_ 
 _symmetry_equiv_pos_as_xyz 
 'x, y, z' 
 '-x, y+1/2, -z' 
  
_cell_length_a                    9.2413(11) 
_cell_length_b                    6.7008(8) 
_cell_length_c                    19.746(2) 
_cell_angle_alpha                 90.00 
_cell_angle_beta                  100.454(2) 
_cell_angle_gamma                 90.00 
_cell_volume                      1202.5(2) 
_cell_formula_units_Z             4 
_cell_measurement_temperature     213(2) 
_cell_measurement_reflns_used     312 
_cell_measurement_theta_min       2.35 
_cell_measurement_theta_max       27.23 
  
_exptl_crystal_description        needle 
_exptl_crystal_colour             yellow 
_exptl_crystal_size_max           0.12 
_exptl_crystal_size_mid           0.06 
_exptl_crystal_size_min           0.06 
_exptl_crystal_density_meas       ? 
_exptl_crystal_density_diffrn     1.835 
_exptl_crystal_density_method     'not measured' 
_exptl_crystal_F_000              648 
_exptl_absorpt_coefficient_mu     2.652 
_exptl_absorpt_correction_type    'semi-empirical, SADABS' 
_exptl_absorpt_correction_T_min   0.7414 
_exptl_absorpt_correction_T_max   0.8571 
_exptl_absorpt_process_details    ? 
  
_exptl_special_details 
; 
Data was collected using a BRUKER SMART CCD (charge coupled devi ce) based 
diffractometer equipped with an LT-2 low-temperature apparatus operating at 
213 K.  A suitable crystal was chosen and mounted on a glass fiber using 
grease. 
Data were measured using omega scans of 0.3\% per frame for 30 s , such 
that a hemisphere was collected. A total of 1271 frames were collected with a 
final resolution of 0.75 \%A.  The first 50 frames  were recollected at the end 
of data collection to monitor for decay.  Cell parameters were retrieved using 
SMART software and refined using SAINT on all observed reflections.  Data 
reduction was performed using the SAINT software which corrects for Lp and 
decay.  Absorption corrections were applied using SADABS based on Blessing, 
(1995).  The structures are solved by the direct method using the SHELX-90 
program and refined by least squares method on F2 SHELXL-93, incorporated in 
SHELXTL V5.1. 
  
Carbon-bound H atoms were placed in idealized positions and refined as a riding 
model. 
  
; 
  
_diffrn_ambient_temperature       213(2) 
_diffrn_radiation_wavelength      0.71073 
_diffrn_radiation_type            MoK\a 
_diffrn_radiation_source          'fine-focus sealed tube' 
_diffrn_radiation_monochromator   graphite 
_diffrn_measurement_device_type   ? 
_diffrn_measurement_method        '\w, 0.3 deg' 
_diffrn_detector_area_resol_mean  836.6 
_diffrn_standards_number          0 
_diffrn_standards_interval_count  0 
_diffrn_standards_interval_time   ? 
_diffrn_standards_decay_%         <1 
_diffrn_reflns_number             7950 
_diffrn_reflns_av_R_equivalents   0.0317 
_diffrn_reflns_av_sigmaI/netI     0.0261 
_diffrn_reflns_limit_h_min        -12 
_diffrn_reflns_limit_h_max        12 
_diffrn_reflns_limit_k_min        -7 
_diffrn_reflns_limit_k_max        8 
_diffrn_reflns_limit_l_min        -25 
_diffrn_reflns_limit_l_max        20 
_diffrn_reflns_theta_min          1.05 
_diffrn_reflns_theta_max          28.28 
_reflns_number_total              4785 
_reflns_number_gt                 4625 
_reflns_threshold_expression      >2sigma(I) 
  
_computing_data_collection        'ASTRO (BRUKER, V5.007, 1997)' 
_computing_cell_refinement        'SMART (BRUKER, V5.054, 1998)' 
_computing_data_reduction         'SAINT (BRUKER, V6.01, 1999)' 
_computing_structure_solution     'SHELXS-97 (Sheldrick, 1990)' 
_computing_structure_refinement   'SHELXL-97 (Sheldrick, 1997)' 
_computing_molecular_graphics     'SHELXTL (BRUKER, 1998, V5.1)' 
_computing_publication_material   'XCIF (Sheldrick and BRUKER, 1997, V5.1)' 
  
_refine_special_details 
; 
 Refinement of F^2^ against ALL reflections.  The weighted R-factor wR and 
 goodness of fit S are based on F^2^, conventional R-factors R are based 
 on F, with F set to zero for negative F^2^. The threshold expression of 
 F^2^ > 2sigma(F^2^) is used only for calculating R-factors(gt) etc. and is 
 not relevant to the choice of reflections for refinement.  R-factors based 
 on F^2^ are statistically about twice as large as those based on F, and R- 
 factors based on ALL data will be even larger. 
; 
  
_refine_ls_structure_factor_coef  Fsqd 
_refine_ls_matrix_type            full 
_refine_ls_weighting_scheme       calc 
_refine_ls_weighting_details 
 'calc w=1/[\s^2^(Fo^2^)+(0.0557P)^2^+1.7055P] where P=(Fo^2^+2Fc^2^)/3' 
_atom_sites_solution_primary      direct 
_atom_sites_solution_secondary    difmap 
_atom_sites_solution_hydrogens    geom 
_refine_ls_hydrogen_treatment     mixed 
_refine_ls_extinction_method      none 
_refine_ls_extinction_coef        ? 
_refine_ls_abs_structure_details 
 'Flack H D (1983), Acta Cryst. A39, 876-881' 
_refine_ls_abs_structure_Flack    0.02(3) 
_refine_ls_number_reflns          4785 
_refine_ls_number_parameters      289 
_refine_ls_number_restraints      1 
_refine_ls_R_factor_all           0.0356 
_refine_ls_R_factor_gt            0.0342 
_refine_ls_wR_factor_ref          0.0905 
_refine_ls_wR_factor_gt           0.0895 
_refine_ls_goodness_of_fit_ref    1.039 
_refine_ls_restrained_S_all       1.039 
_refine_ls_shift/su_max           0.001 
_refine_ls_shift/su_mean          0.000 
  
loop_ 
 _atom_site_label 
 _atom_site_type_symbol 
 _atom_site_fract_x 
 _atom_site_fract_y 
 _atom_site_fract_z 
 _atom_site_U_iso_or_equiv 
 _atom_site_adp_type 
 _atom_site_occupancy 
 _atom_site_symmetry_multiplicity 
 _atom_site_calc_flag 
 _atom_site_refinement_flags 
 _atom_site_disorder_assembly 
 _atom_site_disorder_group 
I1 I 0.74941(3) 0.67478(5) -0.100471(15) 0.03289(9) Uani 1 1 d . . . 
O1 O 0.5960(5) 0.7936(7) 0.0220(2) 0.0439(10) Uani 1 1 d . . . 
O2 O 0.8877(6) 0.6564(10) 0.2765(2) 0.0611(14) Uani 1 1 d . . . 
O3 O 0.8512(5) 0.0927(7) 0.0892(3) 0.0488(11) Uani 1 1 d . . . 
C1 C 0.7375(4) 0.5276(8) -0.0085(2) 0.0251(8) Uani 1 1 d . . . 
C2 C 0.6619(5) 0.6404(8) 0.0396(3) 0.0284(10) Uani 1 1 d . . . 
C3 C 0.6771(5) 0.5614(8) 0.1133(2) 0.0274(10) Uani 1 1 d . . . 
C4 C 0.8282(6) 0.6335(8) 0.1538(2) 0.0309(11) Uani 1 1 d . . . 
H4A H 0.9069 0.5897 0.1300 0.037 Uiso 1 1 calc R . . 
H4B H 0.8297 0.7796 0.1556 0.037 Uiso 1 1 calc R . . 
C5 C 0.8553(7) 0.5502(11) 0.2263(3) 0.0418(13) Uani 1 1 d . . . 
C6 C 0.8421(8) 0.3285(11) 0.2313(3) 0.0515(16) Uani 1 1 d . . . 
H6A H 0.8441 0.2919 0.2795 0.062 Uiso 1 1 calc R . . 
H6B H 0.9271 0.2660 0.2166 0.062 Uiso 1 1 calc R . . 
C7 C 0.7000(7) 0.2461(10) 0.1871(3) 0.0430(13) Uani 1 1 d . . . 
H7A H 0.7062 0.1003 0.1850 0.052 Uiso 1 1 calc R . . 
H7B H 0.6159 0.2802 0.2088 0.052 Uiso 1 1 calc R . . 
C8 C 0.6749(5) 0.3310(9) 0.1137(3) 0.0311(10) Uani 1 1 d . . . 
H8A H 0.5750 0.2895 0.0911 0.037 Uiso 1 1 calc R . . 
C9 C 0.7814(5) 0.2435(8) 0.0718(3) 0.0307(10) Uani 1 1 d . . . 
C10 C 0.7961(5) 0.3438(8) 0.0057(2) 0.0270(9) Uani 1 1 d . . . 
C11 C 0.5521(7) 0.6493(11) 0.1456(3) 0.0443(15) Uani 1 1 d . . . 
H11A H 0.5564 0.7938 0.1441 0.066 Uiso 1 1 calc R . . 
H11B H 0.5628 0.6056 0.1930 0.066 Uiso 1 1 calc R . . 
H11C H 0.4583 0.6041 0.1200 0.066 Uiso 1 1 calc R . . 
C12 C 0.8787(6) 0.2320(8) -0.0411(3) 0.0357(11) Uani 1 1 d . . . 
H12A H 0.8812 0.3107 -0.0821 0.054 Uiso 1 1 calc R . . 
H12B H 0.8298 0.1059 -0.0541 0.054 Uiso 1 1 calc R . . 
H12C H 0.9784 0.2069 -0.0173 0.054 Uiso 1 1 calc R . . 
I1B I 0.85194(4) 0.52814(6) 0.47366(2) 0.04537(12) Uani 1 1 d . . . 
O1B O 0.5304(5) 0.3750(8) 0.4556(2) 0.0493(11) Uani 1 1 d . . . 
O2B O 0.1784(5) 0.4676(8) 0.2129(2) 0.0507(12) Uani 1 1 d . . . 
O3B O 0.5057(5) 1.0463(8) 0.3129(3) 0.0542(11) Uani 1 1 d . . . 
C1B C 0.6546(5) 0.6558(10) 0.4224(2) 0.0328(11) Uani 1 1 d . . . 
C2B C 0.5223(5) 0.5292(10) 0.4232(2) 0.0320(10) Uani 1 1 d . . . 
C3B C 0.3778(5) 0.5962(8) 0.3781(3) 0.0276(10) Uani 1 1 d . . . 
C4B C 0.3805(5) 0.5092(8) 0.3051(2) 0.0309(10) Uani 1 1 d . . . 
H4BA H 0.4720 0.5493 0.2903 0.037 Uiso 1 1 calc R . . 
H4BB H 0.3785 0.3631 0.3071 0.037 Uiso 1 1 calc R . . 
C5B C 0.2493(6) 0.5830(9) 0.2528(3) 0.0350(12) Uani 1 1 d . . . 
C6B C 0.2206(7) 0.8017(10) 0.2512(3) 0.0393(13) Uani 1 1 d . . . 
H6BA H 0.1222 0.8267 0.2244 0.047 Uiso 1 1 calc R . . 
H6BB H 0.2919 0.8680 0.2276 0.047 Uiso 1 1 calc R . . 
C7B C 0.2306(6) 0.8947(9) 0.3233(3) 0.0387(12) Uani 1 1 d . . . 
H7BA H 0.2318 1.0405 0.3193 0.046 Uiso 1 1 calc R . . 
H7BB H 0.1430 0.8574 0.3419 0.046 Uiso 1 1 calc R . . 
C8B C 0.3689(5) 0.8264(9) 0.3736(3) 0.0322(11) Uani 1 1 d . . . 
H8BA H 0.3607 0.8770 0.4198 0.039 Uiso 1 1 calc R . . 
C9B C 0.5066(6) 0.9138(8) 0.3551(3) 0.0330(11) Uani 1 1 d . . . 
C10B C 0.6522(5) 0.8323(9) 0.3917(3) 0.0313(10) Uani 1 1 d . . . 
C11B C 0.2487(5) 0.5081(12) 0.4065(3) 0.0431(14) Uani 1 1 d . . . 
H11D H 0.2578 0.3639 0.4086 0.065 Uiso 1 1 calc R . . 
H11E H 0.1572 0.5441 0.3766 0.065 Uiso 1 1 calc R . . 
H11F H 0.2490 0.5602 0.4523 0.065 Uiso 1 1 calc R . . 
C12B C 0.7825(7) 0.9601(11) 0.3868(4) 0.0467(14) Uani 1 1 d . . . 
H12D H 0.8710 0.8973 0.4117 0.070 Uiso 1 1 calc R . . 
H12E H 0.7703 1.0900 0.4067 0.070 Uiso 1 1 calc R . . 
H12F H 0.7908 0.9760 0.3388 0.070 Uiso 1 1 calc R . . 
  
loop_ 
 _atom_site_aniso_label 
 _atom_site_aniso_U_11 
 _atom_site_aniso_U_22 
 _atom_site_aniso_U_33 
 _atom_site_aniso_U_23 
 _atom_site_aniso_U_13 
 _atom_site_aniso_U_12 
I1 0.03386(16) 0.03310(16) 0.03170(14) 0.00518(14) 0.00590(10) 0.00532(13) 
O1 0.050(2) 0.041(3) 0.040(2) 0.0002(18) 0.0052(17) 0.0226(19) 
O2 0.087(4) 0.060(4) 0.0335(19) -0.007(2) 0.004(2) -0.012(3) 
O3 0.056(3) 0.031(2) 0.062(3) 0.019(2) 0.019(2) 0.0108(19) 
C1 0.0203(17) 0.024(2) 0.030(2) -0.003(2) 0.0018(15) 0.0028(18) 
C2 0.0216(19) 0.028(3) 0.034(2) -0.0013(19) 0.0021(16) 0.0023(17) 
C3 0.0228(19) 0.029(3) 0.032(2) 0.0001(18) 0.0086(16) 0.0000(17) 
C4 0.036(2) 0.028(3) 0.028(2) 0.0028(18) 0.0041(18) -0.0060(18) 
C5 0.045(3) 0.044(3) 0.034(3) 0.005(2) 0.000(2) -0.006(3) 
C6 0.068(4) 0.043(4) 0.038(3) 0.016(3) -0.004(3) -0.008(3) 
C7 0.058(4) 0.033(3) 0.040(3) 0.008(2) 0.015(3) -0.012(3) 
C8 0.026(2) 0.030(3) 0.038(2) 0.001(2) 0.0071(18) -0.0082(19) 
C9 0.024(2) 0.025(2) 0.042(3) 0.002(2) 0.0045(19) -0.0059(17) 
C10 0.0200(18) 0.026(2) 0.034(2) 0.0004(19) 0.0021(16) -0.0006(17) 
C11 0.043(3) 0.048(4) 0.047(3) -0.005(3) 0.022(2) 0.009(3) 
C12 0.041(3) 0.027(3) 0.040(3) -0.001(2) 0.010(2) 0.006(2) 
I1B 0.02892(16) 0.0525(2) 0.0519(2) 0.00676(19) 0.00002(14) 0.00460(16) 
O1B 0.045(2) 0.050(3) 0.048(2) 0.022(2) -0.0060(18) -0.0081(19) 
O2B 0.050(2) 0.054(3) 0.042(2) -0.019(2) -0.0087(18) 0.005(2) 
O3B 0.051(2) 0.036(2) 0.074(3) 0.019(2) 0.006(2) 0.001(2) 
C1B 0.027(2) 0.041(3) 0.030(2) -0.001(2) 0.0042(16) 0.002(2) 
C2B 0.030(2) 0.037(3) 0.029(2) 0.003(2) 0.0039(16) -0.002(2) 
C3B 0.025(2) 0.031(2) 0.026(2) 0.0051(18) 0.0041(17) -0.0012(18) 
C4B 0.034(2) 0.027(3) 0.030(2) -0.003(2) 0.0024(17) 0.000(2) 
C5B 0.037(3) 0.039(3) 0.028(2) -0.001(2) 0.003(2) 0.002(2) 
C6B 0.045(3) 0.034(3) 0.035(3) 0.006(2) -0.004(2) 0.001(2) 
C7B 0.035(3) 0.032(3) 0.045(3) -0.003(2) -0.002(2) 0.009(2) 
C8B 0.032(2) 0.030(3) 0.033(2) -0.007(2) 0.0033(18) 0.004(2) 
C9B 0.036(3) 0.023(3) 0.039(3) -0.005(2) 0.005(2) -0.0011(19) 
C10B 0.029(2) 0.030(3) 0.035(2) -0.004(2) 0.0060(18) -0.0006(19) 
C11B 0.032(3) 0.055(4) 0.042(3) 0.010(3) 0.009(2) -0.003(3) 
C12B 0.040(3) 0.041(3) 0.058(4) 0.000(3) 0.009(3) -0.013(3) 
  
_geom_special_details 
; 
 All esds (except the esd in the dihedral angle between two l.s. planes) 
 are estimated using the full covariance matrix.  The cell esds are taken 
 into account individually in the estimation of esds in distances, angles 
 and torsion angles; correlations between esds in cell parameters are only 
 used when they are defined by crystal symmetry.  An approximate (isotropic) 
 treatment of cell esds is used for estimating esds involving l.s. planes. 
; 
  
loop_ 
 _geom_bond_atom_site_label_1 
 _geom_bond_atom_site_label_2 
 _geom_bond_distance 
 _geom_bond_site_symmetry_2 
 _geom_bond_publ_flag 
I1 C1 2.086(5) . ? 
O1 C2 1.212(7) . ? 
O2 C5 1.213(8) . ? 
O3 C9 1.215(7) . ? 
C1 C10 1.354(7) . ? 
C1 C2 1.484(7) . ? 
C2 C3 1.531(7) . ? 
C3 C11 1.534(7) . ? 
C3 C8 1.544(8) . ? 
C3 C4 1.555(7) . ? 
C4 C5 1.514(7) . ? 
C4 H4A 0.9800 . ? 
C4 H4B 0.9800 . ? 
C5 C6 1.495(10) . ? 
C6 C7 1.541(9) . ? 
C6 H6A 0.9800 . ? 
C6 H6B 0.9800 . ? 
C7 C8 1.534(7) . ? 
C7 H7A 0.9800 . ? 
C7 H7B 0.9800 . ? 
C8 C9 1.515(8) . ? 
C8 H8A 0.9900 . ? 
C9 C10 1.496(7) . ? 
C10 C12 1.501(7) . ? 
C11 H11A 0.9700 . ? 
C11 H11B 0.9700 . ? 
C11 H11C 0.9700 . ? 
C12 H12A 0.9700 . ? 
C12 H12B 0.9700 . ? 
C12 H12C 0.9700 . ? 
I1B C1B 2.101(5) . ? 
O1B C2B 1.211(8) . ? 
O2B C5B 1.208(7) . ? 
O3B C9B 1.216(7) . ? 
C1B C10B 1.327(8) . ? 
C1B C2B 1.490(7) . ? 
C2B C3B 1.532(7) . ? 
C3B C11B 1.525(7) . ? 
C3B C8B 1.547(9) . ? 
C3B C4B 1.560(7) . ? 
C4B C5B 1.526(7) . ? 
C4B H4BA 0.9800 . ? 
C4B H4BB 0.9800 . ? 
C5B C6B 1.489(9) . ? 
C6B C7B 1.542(8) . ? 
C6B H6BA 0.9800 . ? 
C6B H6BB 0.9800 . ? 
C7B C8B 1.539(7) . ? 
C7B H7BA 0.9800 . ? 
C7B H7BB 0.9800 . ? 
C8B C9B 1.505(8) . ? 
C8B H8BA 0.9900 . ? 
C9B C10B 1.510(7) . ? 
C10B C12B 1.495(8) . ? 
C11B H11D 0.9700 . ? 
C11B H11E 0.9700 . ? 
C11B H11F 0.9700 . ? 
C12B H12D 0.9700 . ? 
C12B H12E 0.9700 . ? 
C12B H12F 0.9700 . ? 
  
loop_ 
 _geom_angle_atom_site_label_1 
 _geom_angle_atom_site_label_2 
 _geom_angle_atom_site_label_3 
 _geom_angle 
 _geom_angle_site_symmetry_1 
 _geom_angle_site_symmetry_3 
 _geom_angle_publ_flag 
C10 C1 C2 123.2(5) . . ? 
C10 C1 I1 121.9(4) . . ? 
C2 C1 I1 114.9(4) . . ? 
O1 C2 C1 121.3(5) . . ? 
O1 C2 C3 121.3(4) . . ? 
C1 C2 C3 117.4(4) . . ? 
C2 C3 C11 108.4(4) . . ? 
C2 C3 C8 110.6(4) . . ? 
C11 C3 C8 111.7(5) . . ? 
C2 C3 C4 107.5(4) . . ? 
C11 C3 C4 109.9(4) . . ? 
C8 C3 C4 108.6(4) . . ? 
C5 C4 C3 110.5(4) . . ? 
C5 C4 H4A 109.5 . . ? 
C3 C4 H4A 109.5 . . ? 
C5 C4 H4B 109.5 . . ? 
C3 C4 H4B 109.5 . . ? 
H4A C4 H4B 108.1 . . ? 
O2 C5 C6 122.7(6) . . ? 
O2 C5 C4 122.0(6) . . ? 
C6 C5 C4 115.3(5) . . ? 
C5 C6 C7 113.0(5) . . ? 
C5 C6 H6A 109.0 . . ? 
C7 C6 H6A 109.0 . . ? 
C5 C6 H6B 109.0 . . ? 
C7 C6 H6B 109.0 . . ? 
H6A C6 H6B 107.8 . . ? 
C8 C7 C6 111.7(5) . . ? 
C8 C7 H7A 109.3 . . ? 
C6 C7 H7A 109.3 . . ? 
C8 C7 H7B 109.3 . . ? 
C6 C7 H7B 109.3 . . ? 
H7A C7 H7B 107.9 . . ? 
C9 C8 C7 111.8(5) . . ? 
C9 C8 C3 111.9(4) . . ? 
C7 C8 C3 112.1(5) . . ? 
C9 C8 H8A 106.9 . . ? 
C7 C8 H8A 106.9 . . ? 
C3 C8 H8A 106.9 . . ? 
O3 C9 C10 119.6(5) . . ? 
O3 C9 C8 122.1(5) . . ? 
C10 C9 C8 118.3(4) . . ? 
C1 C10 C9 119.5(4) . . ? 
C1 C10 C12 123.8(5) . . ? 
C9 C10 C12 116.7(4) . . ? 
C3 C11 H11A 109.5 . . ? 
C3 C11 H11B 109.5 . . ? 
H11A C11 H11B 109.5 . . ? 
C3 C11 H11C 109.5 . . ? 
H11A C11 H11C 109.5 . . ? 
H11B C11 H11C 109.5 . . ? 
C10 C12 H12A 109.5 . . ? 
C10 C12 H12B 109.5 . . ? 
H12A C12 H12B 109.5 . . ? 
C10 C12 H12C 109.5 . . ? 
H12A C12 H12C 109.5 . . ? 
H12B C12 H12C 109.5 . . ? 
C10B C1B C2B 124.5(5) . . ? 
C10B C1B I1B 121.6(4) . . ? 
C2B C1B I1B 113.9(4) . . ? 
O1B C2B C1B 121.3(5) . . ? 
O1B C2B C3B 121.4(5) . . ? 
C1B C2B C3B 117.2(5) . . ? 
C11B C3B C2B 109.3(4) . . ? 
C11B C3B C8B 111.8(5) . . ? 
C2B C3B C8B 111.0(4) . . ? 
C11B C3B C4B 109.9(4) . . ? 
C2B C3B C4B 105.6(4) . . ? 
C8B C3B C4B 109.2(4) . . ? 
C5B C4B C3B 111.1(4) . . ? 
C5B C4B H4BA 109.4 . . ? 
C3B C4B H4BA 109.4 . . ? 
C5B C4B H4BB 109.4 . . ? 
C3B C4B H4BB 109.4 . . ? 
H4BA C4B H4BB 108.0 . . ? 
O2B C5B C6B 122.9(6) . . ? 
O2B C5B C4B 120.3(6) . . ? 
C6B C5B C4B 116.7(5) . . ? 
C5B C6B C7B 113.4(5) . . ? 
C5B C6B H6BA 108.9 . . ? 
C7B C6B H6BA 108.9 . . ? 
C5B C6B H6BB 108.9 . . ? 
C7B C6B H6BB 108.9 . . ? 
H6BA C6B H6BB 107.7 . . ? 
C8B C7B C6B 112.3(5) . . ? 
C8B C7B H7BA 109.2 . . ? 
C6B C7B H7BA 109.2 . . ? 
C8B C7B H7BB 109.2 . . ? 
C6B C7B H7BB 109.2 . . ? 
H7BA C7B H7BB 107.9 . . ? 
C9B C8B C7B 111.6(5) . . ? 
C9B C8B C3B 111.3(4) . . ? 
C7B C8B C3B 111.3(5) . . ? 
C9B C8B H8BA 107.4 . . ? 
C7B C8B H8BA 107.4 . . ? 
C3B C8B H8BA 107.4 . . ? 
O3B C9B C8B 123.3(5) . . ? 
O3B C9B C10B 119.1(5) . . ? 
C8B C9B C10B 117.5(5) . . ? 
C1B C10B C12B 126.4(5) . . ? 
C1B C10B C9B 118.7(5) . . ? 
C12B C10B C9B 114.8(5) . . ? 
C3B C11B H11D 109.5 . . ? 
C3B C11B H11E 109.5 . . ? 
H11D C11B H11E 109.5 . . ? 
C3B C11B H11F 109.5 . . ? 
H11D C11B H11F 109.5 . . ? 
H11E C11B H11F 109.5 . . ? 
C10B C12B H12D 109.5 . . ? 
C10B C12B H12E 109.5 . . ? 
H12D C12B H12E 109.5 . . ? 
C10B C12B H12F 109.5 . . ? 
H12D C12B H12F 109.5 . . ? 
H12E C12B H12F 109.5 . . ? 
  
loop_ 
 _geom_torsion_atom_site_label_1 
 _geom_torsion_atom_site_label_2 
 _geom_torsion_atom_site_label_3 
 _geom_torsion_atom_site_label_4 
 _geom_torsion 
 _geom_torsion_site_symmetry_1 
 _geom_torsion_site_symmetry_2 
 _geom_torsion_site_symmetry_3 
 _geom_torsion_site_symmetry_4 
 _geom_torsion_publ_flag 
C10 C1 C2 O1 -171.3(5) . . . . ? 
I1 C1 C2 O1 9.4(6) . . . . ? 
C10 C1 C2 C3 11.8(7) . . . . ? 
I1 C1 C2 C3 -167.6(3) . . . . ? 
O1 C2 C3 C11 22.7(7) . . . . ? 
C1 C2 C3 C11 -160.3(5) . . . . ? 
O1 C2 C3 C8 145.5(5) . . . . ? 
C1 C2 C3 C8 -37.5(6) . . . . ? 
O1 C2 C3 C4 -96.1(6) . . . . ? 
C1 C2 C3 C4 80.9(5) . . . . ? 
C2 C3 C4 C5 -176.5(5) . . . . ? 
C11 C3 C4 C5 65.7(6) . . . . ? 
C8 C3 C4 C5 -56.8(6) . . . . ? 
C3 C4 C5 O2 -127.4(6) . . . . ? 
C3 C4 C5 C6 53.7(7) . . . . ? 
O2 C5 C6 C7 132.3(7) . . . . ? 
C4 C5 C6 C7 -48.9(8) . . . . ? 
C5 C6 C7 C8 47.8(8) . . . . ? 
C6 C7 C8 C9 72.5(7) . . . . ? 
C6 C7 C8 C3 -54.1(7) . . . . ? 
C2 C3 C8 C9 49.7(5) . . . . ? 
C11 C3 C8 C9 170.6(4) . . . . ? 
C4 C3 C8 C9 -68.0(5) . . . . ? 
C2 C3 C8 C7 176.3(4) . . . . ? 
C11 C3 C8 C7 -62.8(6) . . . . ? 
C4 C3 C8 C7 58.5(5) . . . . ? 
C7 C8 C9 O3 16.4(7) . . . . ? 
C3 C8 C9 O3 143.1(5) . . . . ? 
C7 C8 C9 C10 -165.7(4) . . . . ? 
C3 C8 C9 C10 -39.0(6) . . . . ? 
C2 C1 C10 C9 2.0(7) . . . . ? 
I1 C1 C10 C9 -178.6(3) . . . . ? 
C2 C1 C10 C12 -177.2(5) . . . . ? 
I1 C1 C10 C12 2.2(6) . . . . ? 
O3 C9 C10 C1 -169.5(5) . . . . ? 
C8 C9 C10 C1 12.5(6) . . . . ? 
O3 C9 C10 C12 9.7(7) . . . . ? 
C8 C9 C10 C12 -168.3(4) . . . . ? 
C10B C1B C2B O1B -175.5(6) . . . . ? 
I1B C1B C2B O1B 5.6(7) . . . . ? 
C10B C1B C2B C3B 7.8(8) . . . . ? 
I1B C1B C2B C3B -171.1(4) . . . . ? 
O1B C2B C3B C11B 26.7(8) . . . . ? 
C1B C2B C3B C11B -156.6(5) . . . . ? 
O1B C2B C3B C8B 150.4(6) . . . . ? 
C1B C2B C3B C8B -32.9(6) . . . . ? 
O1B C2B C3B C4B -91.4(6) . . . . ? 
C1B C2B C3B C4B 85.3(6) . . . . ? 
C11B C3B C4B C5B 68.1(6) . . . . ? 
C2B C3B C4B C5B -174.1(5) . . . . ? 
C8B C3B C4B C5B -54.8(6) . . . . ? 
C3B C4B C5B O2B -134.2(6) . . . . ? 
C3B C4B C5B C6B 49.3(7) . . . . ? 
O2B C5B C6B C7B 138.7(6) . . . . ? 
C4B C5B C6B C7B -44.9(7) . . . . ? 
C5B C6B C7B C8B 46.8(7) . . . . ? 
C6B C7B C8B C9B 70.0(6) . . . . ? 
C6B C7B C8B C3B -55.1(7) . . . . ? 
C11B C3B C8B C9B 172.0(4) . . . . ? 
C2B C3B C8B C9B 49.8(6) . . . . ? 
C4B C3B C8B C9B -66.2(5) . . . . ? 
C11B C3B C8B C7B -62.7(6) . . . . ? 
C2B C3B C8B C7B 175.0(4) . . . . ? 
C4B C3B C8B C7B 59.0(6) . . . . ? 
C7B C8B C9B O3B 11.1(8) . . . . ? 
C3B C8B C9B O3B 136.2(6) . . . . ? 
C7B C8B C9B C10B -169.4(5) . . . . ? 
C3B C8B C9B C10B -44.3(6) . . . . ? 
C2B C1B C10B C12B -177.0(6) . . . . ? 
I1B C1B C10B C12B 1.8(8) . . . . ? 
C2B C1B C10B C9B 0.4(8) . . . . ? 
I1B C1B C10B C9B 179.2(4) . . . . ? 
O3B C9B C10B C1B -161.6(6) . . . . ? 
C8B C9B C10B C1B 18.9(7) . . . . ? 
O3B C9B C10B C12B 16.1(8) . . . . ? 
C8B C9B C10B C12B -163.4(5) . . . . ? 
  
_diffrn_measured_fraction_theta_max    0.971 
_diffrn_reflns_theta_full              28.28 
_diffrn_measured_fraction_theta_full   0.971 
_refine_diff_density_max    1.120 
_refine_diff_density_min   -0.751 
_refine_diff_density_rms    0.099 
  
